# Supplementary material
Source: MDPI journal article supplement (https://www.mdpi.com/2073-4344/6/11/168)
Supplement: s1 [file s1]

## Supplementary Materials: Efficient Production of Enantiopure D-Lysine from L-Lysine by a Two-Enzyme Cascade System

Xin Wang, Li Yang, Weijia Cao, Hanxiao Ying, Kequan Chen and Pingkai Ouyang

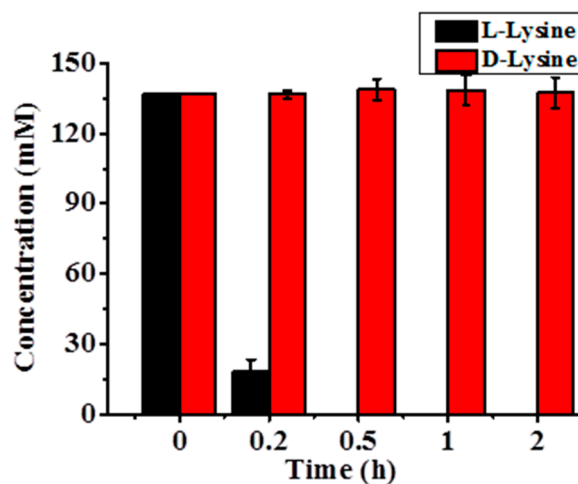

**Figure S1.** Determining the substrate specificity of the lysine decarboxylase.
